# Supplementary material for: A Plant Virus Ensures Viral Stability in the Hemolymph of Vector Insects through Suppressing Prophenoloxidase Activation
Source: PubMed Central journal article supplement (PMC7439478; doi:10.1128/mbio.01453-20), 2020-08-18

Figure S1

Nonviruliferous  
 Viruliferous

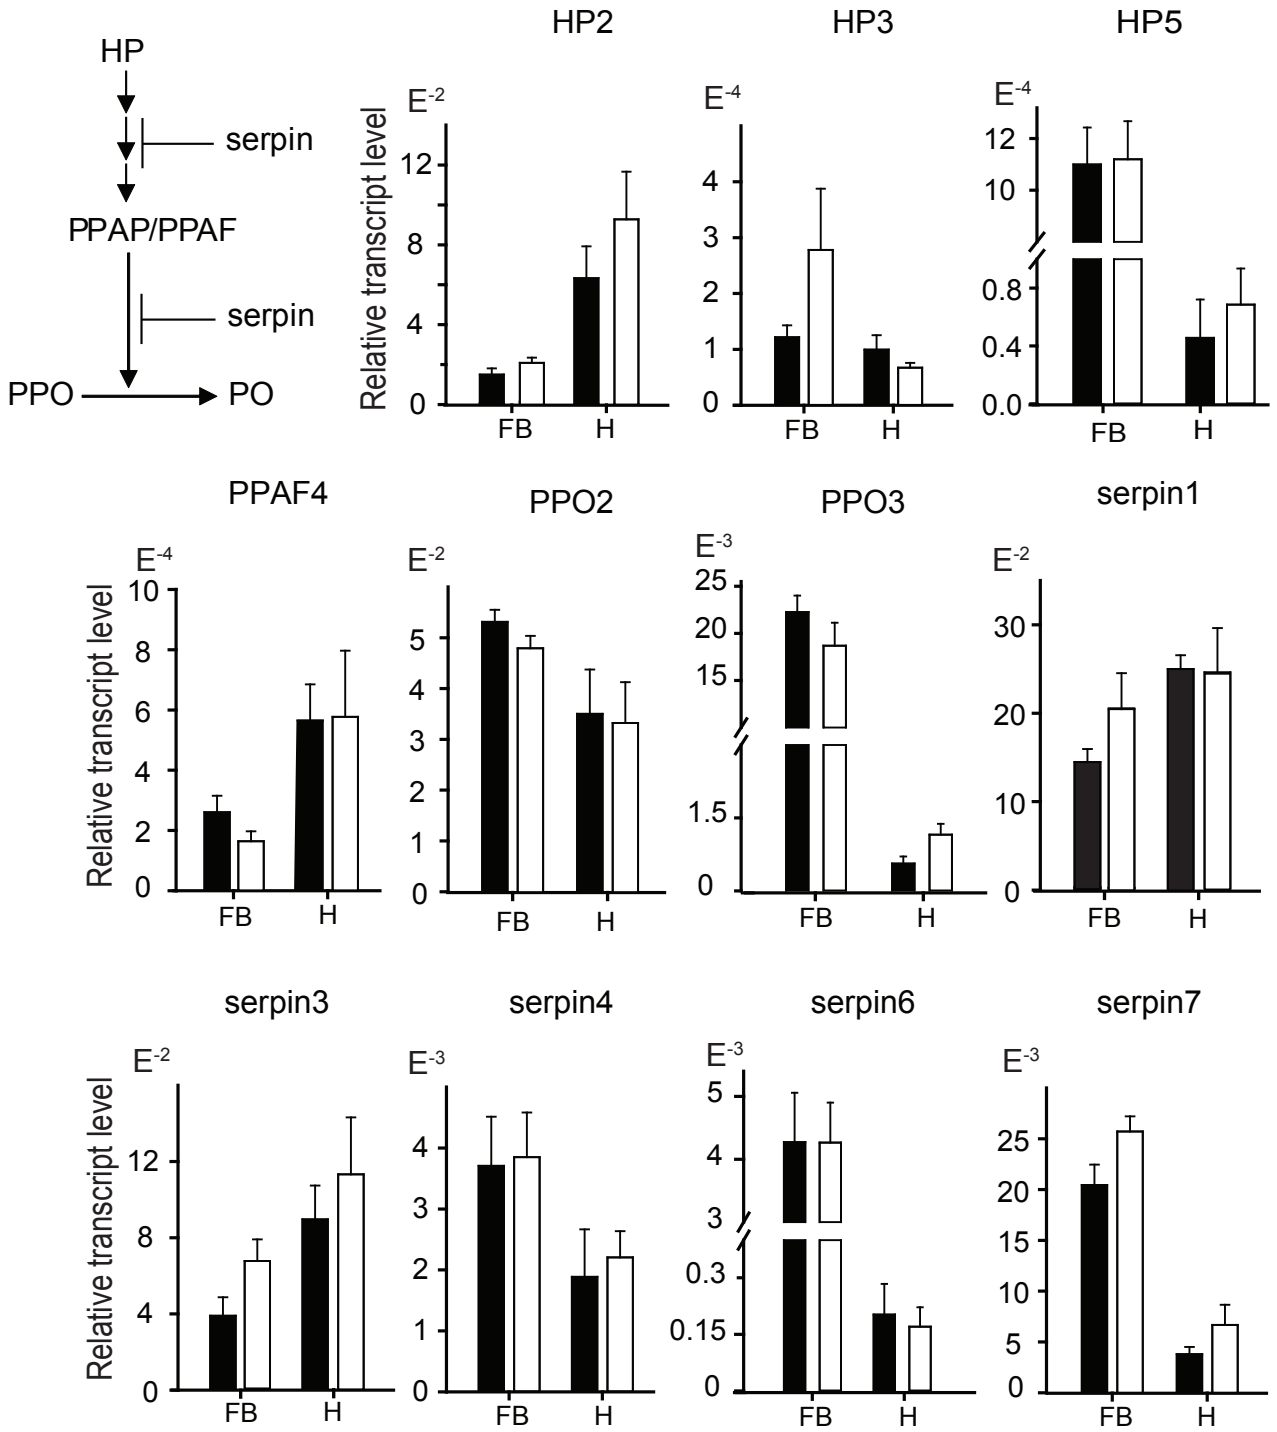

Supplement: mBio.01453-20-sf001.pdf [file mBio.01453-20-sf001.pdf]
